# Supplementary material for: First Report on Chitin in a Non-Verongiid Marine Demosponge: The Mycale euplectellioides Case
Source: PubMed Central journal article supplement (PMC5852496; doi:10.3390/md16020068), 2018-02-20
Supplement: marinedrugs-16-00068-s001.pdf [file marinedrugs-16-00068-s001.pdf]

Supplementary information

## First Report on Chitin in a Non-Verongiid Marine Demosponge: The *Mycale euplectellioides* Case.

Label A:

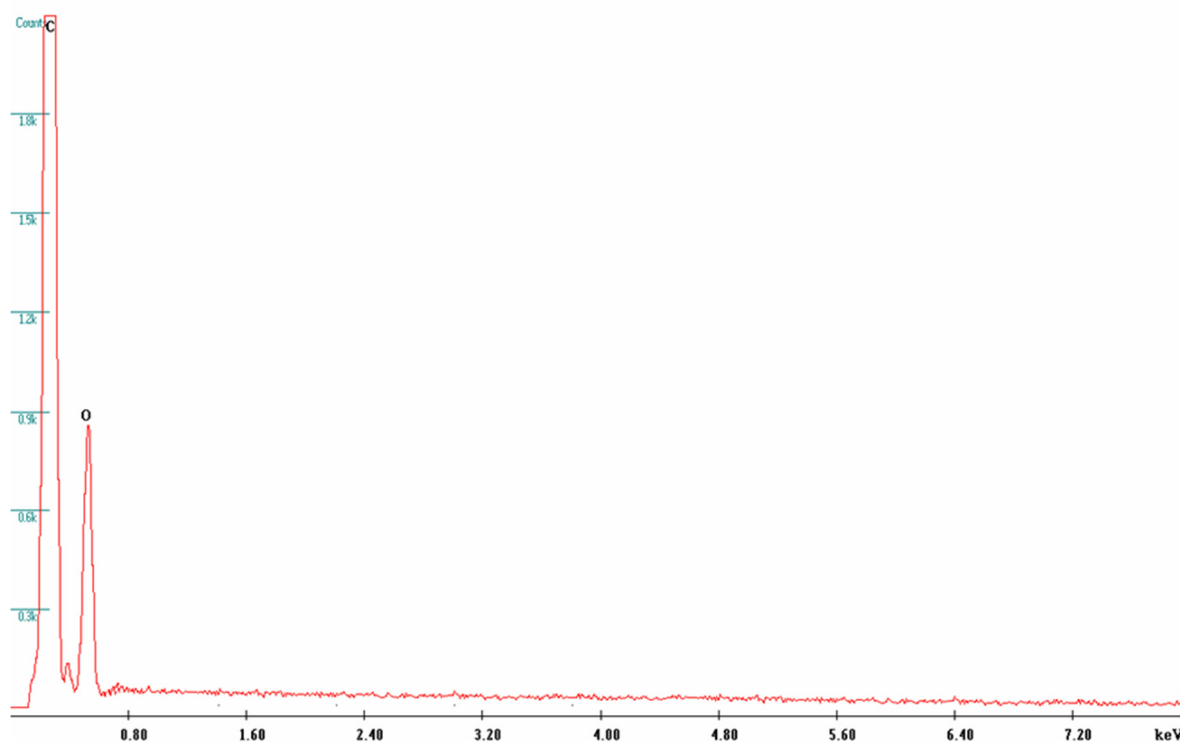

**Figure S1.** EDX spectrum of chitin isolated from *M. euplectellioides* demosponge. Spectrum was registered with use of a XL 30 ESEM Philips-Scanning Electron Microscope (Netherlands). The uncoated samples were investigated at an accelerating voltage of 20 kV.
